1 **Why did the children stop coming? Reasons for paediatric emergency department attendance**  
2 **decrease during the first wave of the COVID-19 pandemic in the United Kingdom: A qualitative**  
3 **study**

4 **Matthew Breckons<sup>1,4</sup>, Sophie Thorne<sup>2</sup>, Rebecca Walsh<sup>2</sup>, Sunil Bhopal<sup>1,3,4</sup>, Stephen Owens<sup>1,2</sup>, Judith**  
5 **Rankin<sup>1,4</sup>**

6 <sup>1</sup> **Population Health Sciences Institute, Newcastle University, NE2 4AX**

7 <sup>2</sup> **Great North Children's Hospital, Newcastle upon Tyne NE1 4LP**

8 <sup>3</sup> **Northumbria Healthcare NHS Foundation Trust, North Shields, NE27 0QJ**

9 <sup>4</sup> **Applied Research Collaboration North East & North Cumbria**

10

11

12 **Abstract**

13 UK 'Lockdown' measures introduced in March 2020 aimed to mitigate the spread of Covid-19.  
14 Although seeking healthcare was still permitted within restrictions, paediatric emergency  
15 department attendances reduced dramatically and led to concern over risks caused by delayed  
16 presentation. Our aim was to gain insight into healthcare decisions faced by parents during the first  
17 wave of the Covid-19 pandemic and to understand if use of urgent healthcare, self-care, and  
18 information needs differed during lockdown as well as how parents perceived risks of Covid-19.

19 We undertook qualitative telephone interviews with a purposive sample of parents living in the  
20 North East of England recruited through online advertising. We used a semi-structured topic guide  
21 to explore past and current healthcare use, perceptions of risk and the impact of the pandemic on  
22 healthcare decisions. Interviews were transcribed and analysed using Thematic Analysis.

23 Three major themes were identified which concerned (i) how parents made sense of risks posed to,  
24 and by their children, (ii) understanding information regarding health services and (iii) attempting to  
25 make the right decision. These themes contribute to the understanding of the initial impact of Covid-  
26 19 and associated restrictions on parental decisions about urgent healthcare for children. These  
27 findings are important to consider when planning for potential future public health emergencies but  
28 also in the wider context of encouraging appropriate use of urgent healthcare.

29

30

31

32

33

34

35

36

37

**NOTE: This preprint reports new research that has not been certified by peer review and should not be used to guide clinical practice.**

## 38 Introduction

39 Covid-19 cases were first identified in the UK in January 2020 after which they increased  
40 exponentially. This was followed by a series of government control actions aimed at mitigating the  
41 spread of the virus which included the closure of non-essential services, followed shortly by a  
42 national “lockdown”(1).

43 These measures including stringent and legally-enforceable social-distancing rules, played an  
44 important role in controlling Covid-19 in the UK from 23 March 2020 when the core government  
45 message was to “Stay home, Protect the NHS, Save Lives”(2, 3). This messaging varied throughout  
46 the trajectory of the pandemic as lockdown restrictions were eased and tightened in response to  
47 infection rates.

48 While seeking healthcare was always exempt from these control measures, in the weeks that  
49 followed the first national lockdown, there was a sudden and substantial reduction in paediatric  
50 emergency department attendances (4). Hypothesised explanations included: 1) reduced burden of  
51 infectious disease – perhaps due to reduced social mixing, 2) fear of accessing hospital, and 3)  
52 increased self-care at home – perhaps due to reduced school and workplace attendance by children  
53 and parents (5, 6).

54 In April 2020, the Royal College of Paediatrics & Child Health expressed concern over reports of  
55 delayed hospital attendance leading to a small number of children becoming unwell or dying (7). A  
56 survey of 4,075 UK Paediatricians (>90% of all UK Paediatricians) reported nine deaths with delay in  
57 presentation as a possible contributing factor. Around a third of Paediatricians working in  
58 Emergency Departments (ED)/Paediatric Assessment Units reported witnessing at least one delayed-  
59 presentation (7). A recent qualitative study highlighted parental fear as a major factor in delaying  
60 seeking healthcare for children (8).

61 We set out to understand parents’ experiences and views on the use of children’s urgent healthcare  
62 services during the first wave of the Covid-19 pandemic. Our objectives were: to understand if and  
63 how urgent healthcare use, self-care and information needs differed during ‘lockdown’ and to  
64 consider parent perceptions of risks of Covid-19.

65

## 66 Methods

67 We adopted a pragmatic qualitative study design as we sought to understand an ongoing real-world  
68 issue and we placed an emphasis on ‘actionable learning’ (9).

69 Ethical approval was granted by Newcastle University’s Faculty of Medical Sciences Research Ethics  
70 Committee (Ref: 1919/2812).

71

## 72 *Participants and recruitment*

73 Given the pace of change of the pandemic and associated restrictions, we aimed to collect data  
74 rapidly. Accessing views of people who are *not* using a service is, by its nature, challenging; we  
75 therefore sought to gain views from a more general sample of parents on using urgent healthcare  
76 during the pandemic, being aware that this sample was likely to include people who had and had not  
77 needed to make urgent healthcare decisions during the pandemic. From 22<sup>nd</sup> May 2020, we  
78 recruited parents of children aged 0-8 years living in the North-East of England using a written

79 advertisement containing a web link circulated via social media, charity partners, online forums and  
80 public involvement groups. On clicking this link, participants were asked to complete a consent form  
81 and a short questionnaire including demographics, previous use of children's emergency services  
82 and willingness to use these during the pandemic, willingness to participate in an interview, and  
83 contact details. We purposively sampled based on responses to obtain a maximum variation sample.  
84 Potential participants were contacted by phone or e-mail. The study rationale was discussed, any  
85 questions answered and an electronic information sheet was e-mailed.

86 Digitally recorded telephone interviews were conducted by male and female researchers; a  
87 postdoctoral qualitative researcher (MB), a Foundation Interim Year 1(RW) and an Intercalating  
88 Medical Student (ST). RW and ST received supervision throughout the process. Interviewers  
89 introduced themselves as members of the research team. Due to the closure of university buildings  
90 and National regulations permitting leaving home for limited reasons during the data collection  
91 period, it was not possible to obtain hard-copies of written consent and verbal consent was audio  
92 recorded instead. We used a semi-structured topic guide including questions on: past and current  
93 use of children's urgent healthcare and impact of the pandemic on healthcare decisions. The topic  
94 guide was reviewed regularly to add questions and prompts to explore emerging areas of interest in  
95 subsequent interviews. Recordings were transcribed verbatim by an external transcription company  
96 and anonymised to ensure confidentiality. Researchers made field notes after each interview  
97 summarising main points, reflections and considerations for topic guide refinement.

## 98 ***Data analysis***

99 Data were analysed according to principles of thematic analysis (10). Analysis took place  
100 concurrently with data collection with all team members involved. Regular team meetings were held  
101 during the data collection period to review the topic guide, interview process and aid collective  
102 familiarisation. Researcher fieldnotes fed into these discussions. A provisional coding framework,  
103 using a mixture of inductive and deductive coding, was developed at whole team read-throughs of  
104 two transcripts. MB, SB, ST and RW then individually applied this to two further transcripts each  
105 before refining, agreeing a final framework and producing a codebook which included a brief  
106 description of each code. This codebook was used to code all transcripts using NVivo 12. Coded data  
107 were reviewed by all team members individually and discussed before final themes and subthemes  
108 were agreed. The decision to cease recruitment was made collectively by the research team when it  
109 was considered that saturation had been reached in terms of additional interviews not requiring  
110 additional codes (11) or leading to any new themes(12).

111

## 112 **Results**

### 113 **Sample**

114 We received survey responses from 121 parents. We sampled purposively, based on respondents'  
115 survey data regarding: age, sex, location, IMD decile, number and age of children, stated willingness  
116 to use health services during the pandemic and use of healthcare during the pandemic.

117 Demographic composition of the sample was reviewed regularly in order to inform subsequent  
118 invitations to participate in an interview. We approached 25 for interview, four of whom could not  
119 be contacted after multiple attempts at different times of day. We obtained full informed consent  
120 and carried out interviews with 21 parents between 29 May and 31 July 2020 lasting around 30  
121 minutes each (Range: 18-49 minutes). Demographic information for interviewees is shown in Table  
122 1.

123

124 **Table 1. Demographics of interviewees**

|                           | Participants (n=21) |       |
|---------------------------|---------------------|-------|
|                           | n                   | %     |
| Sex                       |                     |       |
| Female                    | 19                  | 90.5% |
| Male                      | 2                   | 9.5%  |
| Age (years)               |                     |       |
| 25-29                     | 3                   | 14.3% |
| 30-34                     | 2                   | 9.5%  |
| 35-39                     | 10                  | 47.6% |
| 40-44                     | 4                   | 19.0% |
| 45-49                     | 2                   | 9.5%  |
| IMD decile                |                     |       |
| 9 and 10 (least deprived) | 7                   | 33.3% |
| 7 and 8                   | 3                   | 14.3% |
| 5 and 6                   | 5                   | 23.8% |
| 3 and 4                   | 2                   | 9.5%  |
| 1 and 2 (most deprived)   | 1                   | 4.8%  |
| Missing                   | 3                   | 14.3% |
| Number of children        |                     |       |
| 1                         | 4                   | 19.0% |
| 2                         | 11                  | 52.4% |
| 3                         | 5                   | 23.8% |
| 4                         | 1                   | 4.8%  |
| Age of youngest child     |                     |       |
| Under 12 months           | 3                   | 14.3% |
| 1-3 years                 | 12                  | 57.1% |
| 4-6 years                 | 1                   | 4.8%  |
| 7-9 years                 | 5                   | 23.8% |

|                                                          |    |       |
|----------------------------------------------------------|----|-------|
| Used Emergency Department for children in past 12 months |    |       |
| Yes                                                      | 14 | 66.7% |
| No                                                       | 7  | 33.3% |
| Used health services during lockdown                     |    |       |
| Yes                                                      | 12 | 57.1% |
| No                                                       | 8  | 38.1% |
| Missing                                                  | 1  | 4.8%  |
| Decision making affected by Covid-19                     |    |       |
| Yes                                                      | 8  | 38.1% |
| No                                                       | 11 | 52.4% |
| Missing                                                  | 2  | 9.5%  |

125

126

127

## 128 Findings

129 Parents raised a range of issues during interviews, with many describing a spectrum of intellectual  
 130 and emotional difficulties in interpreting information related to Covid-19, and their responsibilities  
 131 towards family and wider society. For some parents, this had been a particularly difficult period  
 132 whilst for others, the situation was less challenging to navigate. We identified three major themes  
 133 relating to risk, information, and decision-making, and provide illustrative quotes accompanied by  
 134 and IMD decile and the age of the participants children because these are both well known to  
 135 influence usage of emergency healthcare services (13). While the motivation for this research had  
 136 been to understand reasons for the reduction in Emergency Department (ED) use, it became clear  
 137 from the interviews that parents often referred more widely to services for acute medical conditions  
 138 which sometimes included healthcare routes such as GPs or walk-in centres.

139

### 140 **Theme 1: Making sense of risk**

141 Risk was a major topic in these interviews and was discussed at length by parents. This theme  
 142 describes parents' conceptualisation of risks related to Covid-19 at a point early on in the pandemic  
 143 and how these could impact decisions to seek care. Parents differentiated risk *to* children from  
 144 Covid-19 and the potential risk *from* children to the wider community through passing on the virus.  
 145 The first concerned the direct risk of harm to children from Covid-19; the second concerned the risk  
 146 that infected children posed to families and society. Parents also discussed these risks changing over  
 147 the course of the pandemic and how lockdown measures had the potential to modify risks of  
 148 requiring health services

149 Most parents appeared to regard the risk of their children being seriously affected through  
 150 contracting Covid-19 as small; often citing emerging information as underpinning this view:

151 *I've read quite a bit about risk to children of coronavirus and so whilst I've still got*  
152 *concern around it, my worry isn't particularly that my children will get it and get*  
153 *ill from it. (Interview 3: IMD 3, children aged 10 and 7)*

154 Views to the contrary were minimal in our data, although some emphasised that even though  
155 emerging risk data around children were reassuring, this didn't stop them worrying. Parents  
156 sometimes made reference to the fact that the virus was newly discovered and not fully understood:

157 *in the back of my mind, it's not well known of what any of this virus is or who it attacks or*  
158 *when, I don't know. It's just like, if I had the personal choice, I wouldn't be exposing myself or*  
159 *my family at any NHS [hospital], yes. (Interview 5: IMD 3, child aged 1)*

160 Parents described concerns that hospitals could be a source of infection. For example, being in a  
161 confined space, with young children who were not able to socially distance. These perceptions were  
162 described with reference to pre-Covid, as well as the use of EDs during the pandemic . A parent who  
163 had used the ED during the early stages of the pandemic recounted how they perceived the physical  
164 environment as creating a risk of contracting Covid-19:

165 *So there was a tiny little waiting room and there was four, I think it was four other children,*  
166 *maybe five other children plus one or two parents each in this tiny room... I'm like, "Could you*  
167 *please open a window?" "No, we're not allowed, you have to stay in here. No, we're not*  
168 *allowed to open a window." We spent four hours, I think. I realise that you didn't say*  
169 *anything about the time, but we spent four hours in a tiny room with three or four other kids,*  
170 *people coming and going, all potentially with Coronavirus. I think, if we were going to catch*  
171 *it, that was probably our most risky bit of exposure in the waiting room. (Interview 2: IMD 9,*  
172 *children aged 8, 4 and 1)*

173 Although the opposite was described by another parent who felt reassured that the physical  
174 environment in a hospital created minimal risk of contracting Covid-19:

175 *I mean I'm reassured now that I've been, and I've seen how well everything was managed*  
176 *and I mean to be honest, the baby has been referred to \*Name of hospital 1\*. So, I'm a lot*  
177 *more relaxed about having to take her since being to \*Hospital 2\* and \*Hospital 3\*. So,*  
178 *obviously it felt really safe and it felt really clean. (Interview 15: IMD 10, children aged 8, 4*  
179 *and 1)*

180 Although these data highlight a range of experiences, they suggest that previous experience of  
181 emergency health services as well as those during the pandemic had the potential to reassure or  
182 cause concern amongst parents. As time progressed, parents perceived that hospitals were likely to  
183 become better able to manage these risks:

184 *I would not be particularly worried about them catching Covid in paediatric*  
185 *A&E...I think that that would probably not be a high risk situation for them. I*  
186 *imagine now that the hospital is so slick (Interview 4: IMD 10, children aged 6 and*  
187 *3)*

188 Although most of the discussion of risk to children centred on the potential for them to contract the  
189 virus, another issue raised by a parent was that Covid-19 precautions themselves had the potential  
190 to be distressing for young children; highlighting the impact of the use of personal protective  
191 equipment by clinical staff:

192 *The biggest impact was on the ward, because \*name of son\* being three and a half, he's*  
193 *been into hospital before, we had to wait obviously in the bay and he was so, so upset and*  
194 *distressed by the masks. (Interview 21: IMD 5, children aged 9, 7 and 3)*

195 Although parents described concerns about their children catching Covid-19 and some worried  
196 about the associated risks, these seemed generally to be understood as fairly minimal. On the other  
197 hand, parents described worrying about the impact of their child passing on Covid-19 to others.

198 Parents described concern that their child could pass the virus on to elderly relatives or the wider  
199 community:

200 *It would be foolish for me to say I don't think there's any danger at all [to my child*  
201 *from Covid-19] but, yes, more that you want to prevent the spread as much as*  
202 *possible (Interview 10: IMD missing, children aged 10 and 8)*

203 Some parents spoke of concerns that their child could catch Covid-19 in an ED then potentially pass  
204 it on to the wider community. One parent described concern about spreading the virus as well as the  
205 implications of self-isolating:

206 *My concerns would be that any of us could catch it, but I'm not really worried about that. I'd*  
207 *just be more worried about spreading it to the outer community and the implications like of*  
208 *everyone having to self-isolate. (Interview 7: IMD missing, children aged 4 and 2)*

209 Similarly, a clinical environment could be seen as a potential place where a child could pass the virus  
210 to someone vulnerable:

211 *I'd be reluctant for example to take them into a medical situation in case they were in*  
212 *contact with people who were more vulnerable. (Interview 10: IMD missing, children aged 10*  
213 *and 8)*

214 Although not directly related to risks of the virus, a further point was made by a small number of  
215 parents regarding how lockdown measures had the potential to change the likelihood of requiring  
216 health services as their children were not in contact with other children and engaging in fewer  
217 physical activities with potential to cause injuries:

218 *So, the fact that they weren't interacting, they weren't picking up these colds, they were*  
219 *healthy overall and definitely led to fewer illnesses. And also, the lockdown in general... not*  
220 *the specific nursery, but the fact we weren't going to play parks and running around and*  
221 *stuff as well there was a lot less bruises, cuts, all the things that come with children playing*  
222 *around. (Interview 17, IMD missing, children aged 3 and 1)*

## 223 **Theme 2: Interpreting information on emergency health services**

224 This theme focuses on how parents interpreted information about health services during the  
225 pandemic. Different types of information were described including government public health advice  
226 as well as the internet and social media. Parents also spoke about misinformation about Covid-19  
227 procedures in place in EDs.

228 Parents described how information, guidance and rules influenced their thoughts and actions on  
229 taking their child/children to the ED during this period. Most understood that emergency health  
230 services remained available throughout:



231 *I think there's been enough encouragement that if you've got an unwell child they*  
232 *should be seen. I certainly haven't seen anything to say otherwise. (Interview 17,*  
233 *IMD missing, children aged 3 and 1)*

234 However, this was not universal. Several parents interpreted the 'Stay home, Protect the NHS, Save  
235 lives 'as a clear signal that the NHS should not be used at all:

236 *'protect the NHS' had that impact, if there's any worries apart from Covid then*  
237 *stay away, quite a blunt message. (Interview 3: IMD 3, children aged 10 and 7)*

238 Other parents described the existence of misinformation online, for example one had viewed  
239 information stating that children would be separated from parents if they were suspected of having  
240 Covid-19 and the potential for this to cause worry.

241 *There's lots of stuff going round on mums' groups and things online that say, if your child*  
242 *develops Coronavirus symptoms, they will be taken by themselves in an ambulance....and all*  
243 *this stuff which isn't helpful but I don't think that's the case. I don't think hospitals want*  
244 *loads of unaccompanied children loose (Interview 2: IMD 9, children aged 8, 4 and 1)*

245 While this participant identified this as likely to be untrue, another made reference to maternity  
246 services and how the nature of Covid-related service changes was unclear:

247 *But there's a lot of fear, I think, amongst pregnant women about kind of how birth works*  
248 *and, obviously, not being able to have your partner in. Or the procedure, whether you would*  
249 *have to wear a mask for it and all that sort of stuff. We were lucky enough to have \*name of*  
250 *child\* just before that happened. But kind of, I wanted to send my husband home for the*  
251 *night to sleep after we had the baby, but I said to him I was scared that he wouldn't be*  
252 *allowed to come back in because the situation was changing so rapidly. (Interview 14: IMD 6,*  
253 *child aged under 1)*

254 This was echoed by another participant who felt that, although there was good health information  
255 available online from the NHS, it wasn't clear how the hospitals were currently functioning under  
256 Covid-19 restrictions:

257 *As I said, the NHS guidance online is really good. If you really want to go and find stuff*  
258 *there's plenty of things available. In terms of what my children are like and how they're*  
259 *doing, I don't feel that there's a lack of information. I just think there's a lack of publicity*  
260 *about what it's like in hospitals at the moment. (Interview 10: IMD missing, children aged 10*  
261 *and 8)*

262  
263  
264

### **Theme 3: Making the right decision**

265 This theme describes ways in which parents made decisions regarding the use of emergency  
266 healthcare for their children. Parents described using their judgement to balance risks and also their  
267 desire to behave responsibly and in line with government guidance. Parents who had made  
268 healthcare decisions during the pandemic described and reflected on these choices while for others  
269 this was a hypothetical scenario.

270 All of those who had used the ED during the pandemic had been advised to attend after seeking  
271 advice from the NHS 111 telephone line. One parent described seeking emergency care due to  
272 perceiving that the condition was not something that they could manage themselves:



273 *If it had been just a finger or a cut or something, I probably would have been able*  
274 *to deal with it myself but with it being a head injury I wanted him checked out*  
275 *properly by a professional to make sure that there was no concussion or anything*  
276 *going on. (Interview 13, IMD 6, children aged 9, 5 and under 1)*

277 While it was clear to most parents that emergency services were available if needed, some  
278 confusion was sown by lack of access to other types of NHS care, for example a parent of a newborn  
279 reported difficulty accessing healthcare professionals which meant that they did not access any  
280 services:

281 *And then with lockdown kind of everybody thought we should be seeing somebody, but*  
282 *nobody wanted it to be them...if that makes sense. So, we kind of just muddled through,*  
283 *basically. And still haven't really had him [child] weighed but are just kind of using our own*  
284 *assessment, which still just feels a little bit like... it's our first baby, so not sure if we're doing*  
285 *things right or not essentially. (Interview 14: IMD 6, child aged under 1)*

286 Parents described accessing emergency services only when it was deemed absolutely necessary  
287 although some highlighted that this approach was no different with their pre-pandemic practice:

288 *I don't think the criteria would have been very different, I generally would be quite careful*  
289 *about what situations would be appropriate to take them to A&E anyway. (Interview 3: IMD*  
290 *3, children aged 10 and 7)*

291 Indeed, most parents emphasised that they would not avoid seeking emergency care if their child  
292 needed it, regardless of the pandemic. One parent described being so focused on getting medical  
293 attention for their child that they didn't think about Covid-19:

294 *I had kind of forgotten about it [Covid-19] and that sounds really strange but I had a son*  
295 *who, for all intents and purposes, had received a bite from a dog, needed to go and get some*  
296 *medical attention and that was it. (Interview 18: IMD 5, children aged 5 and 1)*

297 Parents argued that not seeking care for their child was a greater concern than Covid-19.

298 *I think the risk of not seeking help when you need it is far greater than the risk of being*  
299 *exposed to the Covid virus. (Interview 1: IMD 7, children aged 6 and 1)*

300 While for some, decision making was described as being straightforward, other participants referred  
301 to situations they had encountered during the pandemic where they found it difficult to decide on  
302 the best course of action:

303 *It was a very sort of, 'do I take him, do I not'...[but] I would never forgive myself if*  
304 *I didn't take him. (Interview 13, IMD 6, children aged 9, 5 and under 1)*

305 Several parents said that they avoided seeking healthcare for their children during lockdown. One  
306 gave a specific example of delaying seeking care to avoid pressurising healthcare professionals and  
307 services:

308 *That's another thing with my 18 month old, I've actually put off taking her to the*  
309 *GP for quite a while because she's got a limp on one leg and I took her, it will be*  
310 *two weeks on Monday, she went to the GP and I wish I took her sooner but with*  
311 *everything going on, you didn't want to put any extra pressure on the doctors.*  
312 *(Interview 15: IMD 10, children aged 8, 4 and 1)*

313 Another parent reported deciding against making a follow up appointment after receiving  
314 a visit from a paramedic, describing a mixture of concerns about availability of  
315 appointments, but also feeling that there were other patients who may be in greater need:

316 *...were aware that the doctors was probably, massively overly used at that point because of*  
317 *all this Covid so we were like we're not going to get an appointment or, even if we do, there's*  
318 *probably somebody who needs it more than us. (Interview 16: IMD 10, children aged 4 and*  
319 *1)*

320 Others echoed this sentiment of increased caution in accessing emergency care; one parent  
321 described how the pandemic had impacted their decision making criteria in terms of 'raising the  
322 bar 'for when to seek care, also describing how they would take efforts to self-manage at home:

323 *That's the big thing, trying to do what you can at home, hoping that we're putting less*  
324 *pressure on the service and then yes, just raising the bar. Do what we can at home so we're*  
325 *less likely to, A, infect ourselves from being there and B, put pressure on the service, yes.*  
326 *Definitely raising the bar. (Interview 2: IMD 9, children aged 8, 4 and 1)*

327 Similarly, one parent whose child had an existing medical condition and was very accustomed to  
328 attending the ED, described trying to find alternatives to avoid having to attend:

329 *I tried ringing staff earlier on in the day, nobody got back to me because obviously there's a*  
330 *lot going on and I haven't kept on. So, normally I would have just gone straight in, gone into*  
331 *A&E and I just didn't in this instance. I just kept ringing round and round and round until I got*  
332 *hold of a consultant to talk to somebody. (Interview 6: IMD 5, children aged 13 and 9)*

333 Several parents emphasised the value of accessing health advice prior to attending in-person  
334 emergency services, frequently citing NHS 111 but also GPs or opinions of friends in healthcare roles.  
335 This was important in providing reassurance that parents were taking the correct course of action:

336 *Yes, so I used 111 when obviously \*name of son\* was poorly and I have used it in the past*  
337 *but you know what, I think the times I've used it recently has always been about his viral*  
338 *wheeze, when generally you're not quite happy with his breathing, you want that advice and*  
339 *then they say, actually yes what you're telling me, you probably need to come in. But both*  
340 *instances have been when the GP has not been open, I would probably go to the GP first if*  
341 *they were open and if they weren't, then obviously I wouldn't hesitate to call 111. (Interview*  
342 *21: IMD 5, children aged 9, 7 and 3)*

343 While no one in our sample described being completely unwilling to using emergency services, one  
344 participant described a friend who decided against taking their child for emergency treatment  
345 because of Covid-19 concerns:

346 *A friend's child slipped in the bath, he cut his chin open and there as blood all over. She said,*  
347 *"I'm not taking him to the hospital, the risk of Coronavirus, I'm not taking him." So she*  
348 *cleaned his face up and then just got some Elastoplast, whatever, held it together and just*  
349 *made her own little stichy, sticky things to close the gap. (Interview 2: IMD 9, children aged*  
350 *8, 4 and 1)*

351

352

353

## 354 Discussion

355 Our data provide a snapshot of views of a group of parents during the first wave of the Covid-19  
356 pandemic in the UK. This research is part of a growing body of literature which describes short and  
357 longer-term concerns about the impact of Covid-19 on the health and wellbeing of children (14-19)

358 While the rapidly changing landscape with regard to government policy and messaging provides a  
359 challenging context in which to interpret and report such findings, we believe they are important in  
360 contributing towards an understanding of parents' views on accessing emergency healthcare at the  
361 beginning of a pandemic and how these views may be impacted by government policy, public health  
362 information and messaging. They are also important in terms of ensuring that the learning from the  
363 Covid pandemic is used to inform future emergency planning, and access to emergency healthcare  
364 in normal times.

365 We have described how parents weighed up competing information sources, perceptions of risk to  
366 themselves and to their children, government guidelines and rules, and a desire to reduce burden on  
367 the NHS, when considering whether to seek emergency healthcare services for their children during  
368 the Covid-19 pandemic. Whilst parents usually said they would seek care if it was needed, there  
369 were examples where this was not the case. Parents were less concerned that their child might  
370 become ill from hospital-acquired Covid-19 than their potential to become infected and then infect  
371 others. There was considerable divergence in our sample regarding whether the "Stay at Home" and  
372 "Protect the NHS" government messaging encompassed seeking emergency healthcare.

373 Our findings provide explanations for some of the large reduction in emergency healthcare  
374 utilisation seen in EDs, and complement British Paediatric Surveillance Unit data describing  
375 perceptions of delayed-presentation to hospital among British paediatricians (5).

376 Previous studies have identified gaps in the ways that parents make decisions about seeking  
377 emergency-healthcare for children, with one group producing a patient-information leaflet to  
378 address this problem (20). Hesitancy in seeking healthcare during Covid-19 has been previously  
379 described in children with cancer (21) and in the general population. In a survey of 1,044 parents in  
380 Ireland, 22% of those identifying a need for emergency healthcare for their children did not seek it  
381 (22). Others have sought to understand the views of parents accessing vaccination for young  
382 children, with parents needing to weigh up multiple competing factors (23), similar to the process  
383 described by parents in our study. A French study published before the pandemic described six  
384 motives for parents attending the ED, finding that parents were serious and goal-orientated in their  
385 seeking of this healthcare (24). Despite arguments to the contrary from professionals, parents would  
386 be unlikely to agree that visits for apparent minor-illness were 'inappropriate' (24). Our findings are  
387 in accordance; parents took their decision of whether and how to seek healthcare incredibly  
388 seriously and described ways in which they tried to reduce healthcare seeking during the pandemic.  
389 A questionnaire-based project in Ireland attempted to answer similar questions to our study; in  
390 addition to our shared findings of misinterpretation of the 'Stay at home' messaging and perception  
391 of risk, this study reported the importance of parental stress, measured using the stress subscale of  
392 the Depression Anxiety Stress Scale (25).

393 Our study adds to this body of literature by describing the views of parents directly and exploring  
394 decision-making around seeking urgent care at the beginning of the Covid-19 pandemic. Interviews  
395 were done on the telephone, minimising participant inconvenience and maintaining social  
396 distancing. One potential limitation is that we did not interview children, who are often active  
397 partners in making some of these decisions. The study population was relatively small, and

398 represents those with motivation to participate, rather than the whole population. The sample was  
399 also skewed to a less deprived demographic than the general population. Respondent validation  
400 methods may have been helpful in ensuring that our interpretation of data were correct from a  
401 participant perspective.

402 Our findings have several implications for providers of paediatric emergency healthcare services,  
403 both during the current pandemic and in future emergency planning in times of crisis. First,  
404 providers should recognise the complex decision-making processes that parents perform in  
405 determining whether and when to seek help. As discussed, this process was likely to have been  
406 strongly influenced by national Covid-19 messaging. Local providers are well placed to understand  
407 specific needs of their communities, and provide crucial local context to broad national messaging;  
408 these providers could consider developing media-messaging, for example via social-media platforms,  
409 targeted locally to reassure parents. We have discussed the internal ‘threshold ’that parents  
410 described having to reach in order to seek care during the pandemic. This metaphor might also be  
411 useful for organisations attempting to reduce emergency attendances in other contexts, for example  
412 by redirecting to other elements of the healthcare system.

413 Future research should attempt to identify specific groups who are less likely to attend when  
414 required, so that strategies to optimise use of emergency healthcare services, whilst avoiding harm,  
415 can be implemented.

416 “ Stay at home” messages have been used at several points during this pandemic, and may be used  
417 again in future disease outbreaks. This research suggests that this messaging may have led to  
418 adverse consequences, the impacts of which require further study. At the very least, we suggest that  
419 such messaging should be accompanied by clear statements that seeking emergency healthcare  
420 should always be prioritised. In a post-pandemic landscape, this study may be viewed as part of a  
421 wider body of literature concerned with longstanding issues of supporting families to make decisions  
422 regarding appropriate use of health services.

423

424 Acknowledgements: We would like to thank all of the participants who took the time to speak to us  
425 and made this research possible.

426 This project/research/work is supported by the National Institute of Health Research (NIHR) Applied  
427 Research Collaboration (ARC) for the North East and North Cumbria (NENC).

428 SB, MB and JR are members of the NIHR Applied Research Collaboration for the North East and  
429 North Cumbria.

## 430 References

- 431 1. Flynn D, Moloney E, Bhattarai N, Scott J, Breckons M, Avery L, et al. COVID-19  
432 pandemic in the United Kingdom. *Health Policy and Technology*. 2020;9(4):673-91.
- 433 2. BBC News. Coronavirus: UK brings in strict curbs on life to fight virus. 2020 [Available  
434 from: <https://www.bbc.com/news/uk-52014472>.
- 435 3. UK Government. Staying at home and away from others (social distancing) 2020  
436 [Available from: [https://www.gov.uk/government/publications/full-guidance-on-staying-at-](https://www.gov.uk/government/publications/full-guidance-on-staying-at-home-and-away-from-others/full-guidance-on-staying-at-home-and-away-from-others)  
437 [home-and-away-from-others/full-guidance-on-staying-at-home-and-away-from-others](https://www.gov.uk/government/publications/full-guidance-on-staying-at-home-and-away-from-others/full-guidance-on-staying-at-home-and-away-from-others).
- 438 4. Shanmugavadivel D, Liu J-F, Gilhooley C, Elsaadany L, Wood D. Changing patterns of  
439 emergency paediatric presentations during the first wave of COVID-19: learning for the  
440 second wave from a UK tertiary emergency department. *BMJ Paediatr Open*.  
441 2021;5(1):e000967-e.
- 442 5. Lynn RM, Avis JL, Lenton S, Amin-Chowdhury Z, Ladhani SN. Delayed access to care  
443 and late presentations in children during the COVID-19 pandemic: a snapshot survey of  
444 4075 paediatricians in the UK and Ireland. *Archives of disease in childhood*. 2021;106(2):e8-  
445 e.
- 446 6. Chanchlani N, Buchanan F, Gill PJ. Addressing the indirect effects of COVID-19 on the  
447 health of children and young people. *CMAJ : Canadian Medical Association journal = journal*  
448 *de l'Association medicale canadienne*. 2020;192(32):E921-E7.
- 449 7. The Royal College of Paediatrics and Child Health. COVID-19 - statement on delayed  
450 presentations 2020 [Available from: [https://www.rcpch.ac.uk/news-events/news/covid-19-](https://www.rcpch.ac.uk/news-events/news/covid-19-statement-delayed-presentations)  
451 [statement-delayed-presentations](https://www.rcpch.ac.uk/news-events/news/covid-19-statement-delayed-presentations).
- 452 8. Watson G, Pickard L, Williams B, Hargreaves D, Blair M. 'Do I, don't I?' A qualitative  
453 study addressing parental perceptions about seeking healthcare during the COVID-19  
454 pandemic. *Archives of disease in childhood*. 2021.
- 455 9. Kelly LM, Cordeiro M. Three principles of pragmatism for research on organizational  
456 processes. *Methodological Innovations*. 2020;13(2):2059799120937242.
- 457 10. Braun V, Clarke V. Using thematic analysis in psychology. *Qualitative research in*  
458 *psychology*. 2006;3(2):77-101.
- 459 11. Urquhart C. *Grounded theory for qualitative research: A practical guide*: Sage; 2012.
- 460 12. Given LM. *100 questions (and answers) about qualitative research*: SAGE  
461 publications; 2015.
- 462 13. Marbini AD, Hargreaves D. Children and young people's use of emergency and  
463 inpatient services by age and socio-economic status: an analysis of national hospital episode  
464 statistics in England. *Archives of Disease in Childhood*. 2012;97(Suppl 1):A146-A7.
- 465 14. Adams EL, Smith D, Caccavale LJ, Bean MK. Parents are stressed! Patterns of parent  
466 stress across COVID-19. *Frontiers in Psychiatry*. 2021;12:300.
- 467 15. Jeffs E, Lucas N, Walls T. CoVID-19: Parent and caregiver concerns about reopening  
468 New Zealand schools. *Journal of paediatrics and child health*. 2021;57(3):403-8.
- 469 16. Suffren S, Dubois-Comtois K, Lemelin J-P, St-Laurent D, Milot T. Relations between  
470 Child and Parent Fears and Changes in Family Functioning Related to COVID-19.  
471 *International Journal of Environmental Research and Public Health*. 2021;18(4):1786.
- 472 17. Gilbert LK, Strine TW, Szucs LE, Crawford TN, Parks SE, Barradas DT, et al. Racial and  
473 ethnic differences in parental attitudes and concerns about school reopening during the  
474 COVID-19 pandemic—United States, July 2020. *Morbidity and Mortality Weekly Report*.  
475 2020;69(49):1848.

- 476 18. Ollivier R, Aston M, Price S, Sim M, Benoit B, Joy P, et al. Mental health & Parental  
477 concerns during COVID-19: The experiences of new mothers amidst social isolation.  
478 Midwifery. 2021;94:102902.
- 479 19. Anderson JR, Hughes JL, Trivedi MH. School Personnel and Parents' Concerns Related  
480 to COVID-19 Pandemic's Impact Related to Schools. *School Psychology Review*. 2020:1-11.
- 481 20. Lim E, Mistry RD, Battersby A, Dockerty K, Koshy A, Chopra MN, et al. "How to  
482 Recognize if Your Child Is Seriously Ill" During COVID-19 Lockdown: An Evaluation of Parents'  
483 Confidence and Health-Seeking Behaviors. *Frontiers in pediatrics*. 2020;8:715.
- 484 21. Darlington ASE, Morgan JE, Wagland R, Sodergren SC, Culliford D, Gamble A, et al.  
485 COVID-19 and children with cancer: Parents' experiences, anxieties and support needs.  
486 *Pediatric blood & cancer*. 2021;68(2):e28790.
- 487 22. Nicholson E, McDonnell T, Conlon C, Barrett M, Cummins F, Hensey C, et al. Parental  
488 hesitancy and concerns around accessing paediatric unscheduled healthcare during covid-  
489 19: A cross-sectional survey. *International Journal of Environmental Research and Public*  
490 *Health*. 2020;17(24):9264.
- 491 23. Bell S, Clarke R, Paterson P, Mounier-Jack S. Parents' and guardians' views and  
492 experiences of accessing routine childhood vaccinations during the coronavirus (COVID-19)  
493 pandemic: A mixed methods study in England. *PloS one*. 2020;15(12):e0244049.
- 494 24. Costet Wong A, Claudet I, Sorum P, Mullet E. Why do parents bring their children to  
495 the emergency department? A systematic inventory of motives. *International journal of*  
496 *family medicine*. 2015;2015.
- 497 25. Nicholson E, McDonnell T, Conlon C, Barrett M, Cummins F, Hensey C, et al.  
498 Understanding the Impact of Public Health Advice on Paediatric Healthcare Use During  
499 COVID-19: A Cross-sectional Survey of Parents. 2020.

500
